# Supplementary material
Source: Springer Nature journal article supplement (https://www.springermedizin.de/resource/supplementary/12889_2008_1285_MOESM1_ESM.pdf/9502862)

# Participating Areas

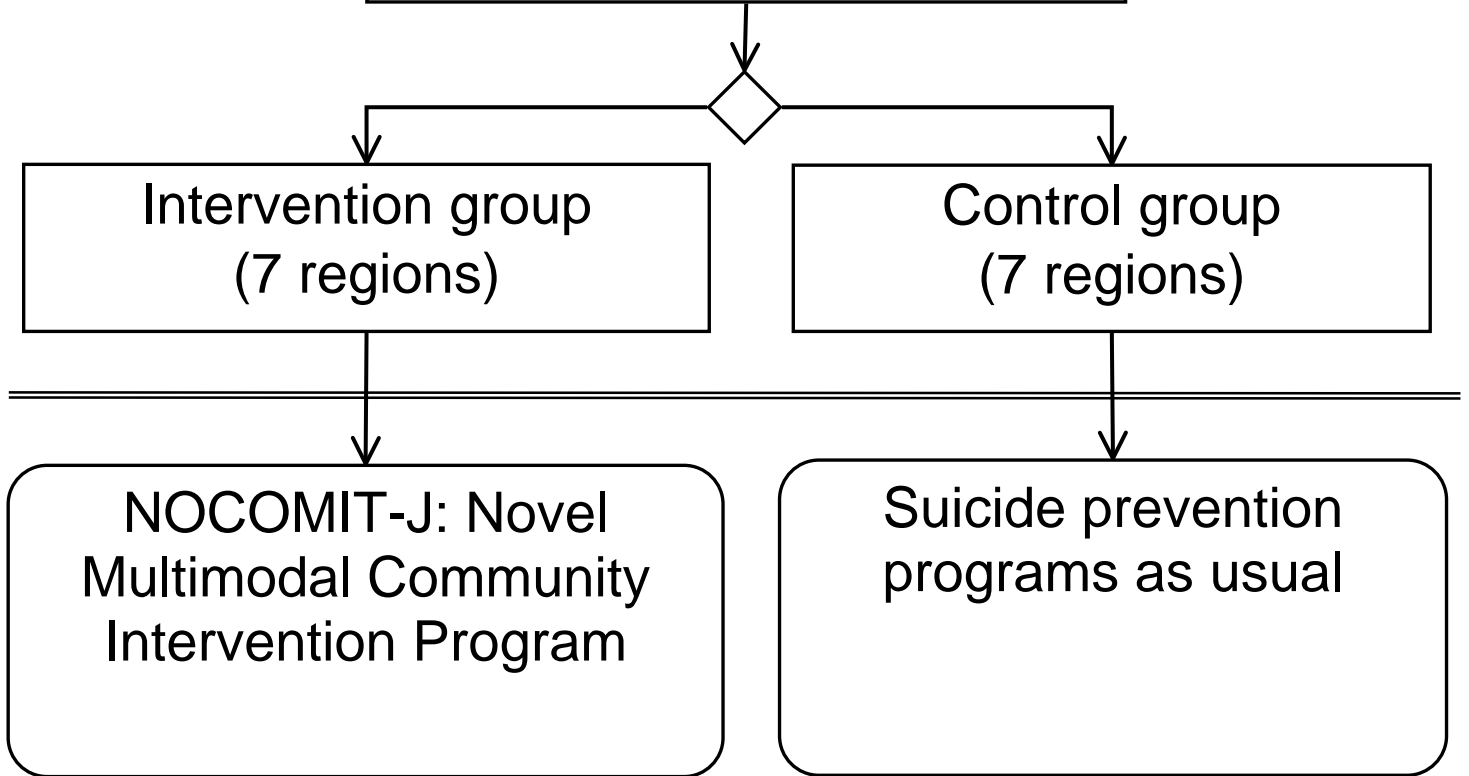

Supplement: MOESM1 [file 9502862]
